# Supplementary material for: Mrc1 protects uncapped budding yeast telomeres from exonuclease EXO1
Source: PubMed Central journal article supplement (PMC2077361; doi:10.1016/j.dnarep.2007.05.010), 2007-11-01
Supplement: mmc1.pdf [file mmc1.pdf]

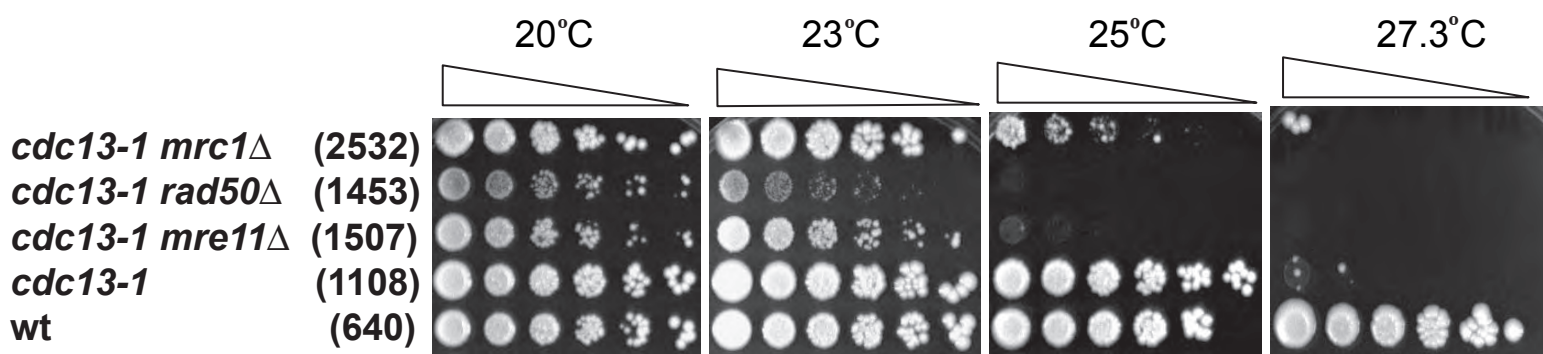

Tsolou, Supplementary Figure 1

Table 1: Yeast strains. \* indicates strains generated in this study

| Strain | Genotype                                                                                                                           | Gen Background | Source       |
|--------|------------------------------------------------------------------------------------------------------------------------------------|----------------|--------------|
| 640    | <i>MATa ade2-1 trp1-1 can1-100 leu2-3,112 his3-11,15 ura3 GAL+ psi+ ssd1-d2 RAD5</i>                                               | W303           | R.Rothstein  |
| 641    | <i>MATalpha ade2-1 trp1-1 can1-100 leu2-3,112 his3-11,15 ura3 GAL+ psi+ ssd1-d2 RAD5</i>                                           | W303           | R.Rothstein  |
| 1091   | <i>MATa rad50::hisG::URA3 ade2-1 trp1-1 can1-100 leu2-3,112 his3-11,15 ura3 GAL+ psi+ ssd1-d2 RAD5</i>                             | W303           | 640          |
| 1095   | <i>MATa chk1::HIS3 ade2-1 trp1-1 can1-100 leu2-3,112 his3-11,15 ura3 GAL+ psi+ ssd1-d2 RAD5</i>                                    | W303           | 640          |
| 1108   | <i>MATa ade2-1 trp1-1 can1-100 leu2-3,112 his3-11,15 ura3 GAL+ psi+ ssd1-d2 RAD5 cdc13-1-int</i>                                   | W303           | 640          |
| 1256   | <i>MATalpha cdc13-1 int rad9::HIS3 RAD5 ade2-1 trp1-1 can1-100 leu2-3,112 his3-11,15 ura3 GAL+ psi+ ssd1-d2</i>                    | W303           | 662x1218     |
| 1296   | <i>MATa exo1::LEU2 cdc13-1-int ade2-1 trp1-1 can1-100 leu2-3,112 his3-11,15 ura3 GAL+ psi+ ssd1-d2 RAD5</i>                        | W303           | 1272x1230    |
| 1366   | <i>MATalpha yku70::HIS3 ade2-1 trp1-1 can1-100 leu2-3,112 his3-11,15 ura3 GAL+ psi+ ssd1-d2 RAD5</i>                               | W303           | 1308x1284    |
| 1408   | <i>MATa ade2-1 trp1-1 can1-100 leu2-3,112 his3-11,15 ura3 GAL+ psi+ ssd1-d2 RAD5 yku70::HIS3 exo1::LEU2</i>                        | W303           | 1273x1364    |
| 1453   | <i>MATalpha rad50::hisG::URA3 cdc13-1 int ade2-1 trp1-1 can1-100 leu2-3,112 his3-11,15 ura3 GAL+ psi+ ssd1-d2 RAD5</i>             | W303           | 1091*1260    |
| 1468   | <i>MATa bar1::hisG RAD+ ade2-1 trp1-1 can1-100 leu2-3,112 his3-11,15 ura3 GAL+ psi+ ssd1-d2 RAD5 cdc15-2 int cdc13-1 int</i>       | W303           | 1436x1438    |
| 1470   | <i>MATa bar1::hisG rad9::HIS3 ade2-1 trp1-1 can1-100 leu2-3,112 his3-11,15 ura3 GAL+ psi+ ssd1-d2 RAD5 cdc15-2 int cdc13-1 int</i> | W303           | 1436x1438    |
| 1507   | <i>MATalpha cdc13-1 int mre11::hisG::URA3 RAD5 ade2-1 trp1-1 can1-100 leu2-3,112 his3-11,15 ura3 GAL+ psi+ ssd1-d2</i>             | W303           | 1331*1259    |
| 1584   | <i>MAT alpha mfa::MFA1pr-HIS3 can1 ura3 leu2 his3 lys2</i>                                                                         | S288C          | Dan Durocher |
| 2116   | <i>MATalpha rad53::HIS3 sml1::Kan exo1::LEU2 cdc13-1 int cdc15-2 int bar1 RAD5 ade2-1 trp1-1 can1-100 ura3 GAL+ psi+ ssd1-d2</i>   | W303           | 1765x1431    |
| 2512*  | <i>MATa ade2-1 trp1-1 can1-100 leu2-3,112 his3-11,15 ura3 GAL+ psi+ ssd1-d2 RAD5 mre1::KANMX6</i>                                  | W303           | 640          |
| 2532*  | <i>MATalpha mre1::KANMX6 cdc13-1 int ade2-1 trp1-1 can1-100 leu2-3,112 his3-11,15 ura3 GAL+ psi+ ssd1-d2 RAD5</i>                  | W303           | 2512 x 1297  |
| 2533*  | <i>MATa mre1::KANMX6 cdc13-1 int ade2-1 trp1-1 can1-100 leu2-3,112 his3-11,15 ura3 GAL+ psi+ ssd1-d2 RAD5</i>                      | W303           | 2512 x 1297  |
| 2534*  | <i>MATa mre1::KANMX6 cdc13-1 int exo1::LEU2 ade2-1 trp1-1 can1-100 leu2-3,112 his3-11,15 ura3 GAL+ psi+ ssd1-d2 RAD5</i>           | W303           | 2512 x 1297  |
| 2535*  | <i>MATalpha mre1::KANMX6 cdc13-1 int exo1::LEU2 ade2-1 trp1-1 can1-100 leu2-3,112 his3-11,15 ura3 GAL+ psi+ ssd1-d2 RAD5</i>       | W303           | 2512 x 1297  |
| 2578*  | <i>MATalpha mre1::KANMX6 yku70::LEU2 chk1::HIS3 ade2-1 trp1-1 can1-100 leu2-3,112 his3-11,15 ura3 GAL+ psi+ ssd1-d2 RAD5</i>       | W303           | 2512x1266    |
| 2580*  | <i>MATa mre1::KANMX6 yku70::LEU2 ade2-1 trp1-1 can1-100 leu2-3,112 his3-11,15 ura3 GAL+ psi+ ssd1-d2 RAD5</i>                      | W303           | 2512x1266    |

|       |                                                                                                                                                 |             |              |
|-------|-------------------------------------------------------------------------------------------------------------------------------------------------|-------------|--------------|
| 2582* | <i>MATalpha mrc1::KANMX6 chk1::HIS3 ade2-1 trp1-1 can1-100 leu2-3,112 his3-11,15 ura3 GAL+ psi+ ssd1-d2 RAD5</i>                                | W303        | 2512x1266    |
| 2583* | <i>MATa mrc1::KANMX6 chk1::HIS3 ade2-1 trp1-1 can1-100 leu2-3,112 his3-11,15 ura3 GAL+ psi+ ssd1-d2 RAD5</i>                                    | W303        | 2512x1266    |
| 2584* | <i>MATalpha yku70::LEU2 ade2-1 trp1-1 can1-100 leu2-3,112 his3-11,15 ura3 GAL+ psi+ ssd1-d2 RAD5</i>                                            | W303        | 2512x1266    |
| 2585* | <i>MATalpha chk1::HIS3 ade2-1 trp1-1 can1-100 leu2-3,112 his3-11,15 ura3 GAL+ psi+ ssd1-d2 RAD5</i>                                             | W303        | 2512x1266    |
| 2586* | <i>MATalpha yku70::LEU2 chk1::HIS3 ade2-1 trp1-1 can1-100 leu2-3,112 his3-11,15 ura3 GAL+ psi+ ssd1-d2 RAD5</i>                                 | W303        | 2512x1266    |
| 2639* | <i>MATa mrc1::KANMX6 chk1::HIS3 cdc13-1 int ade2-1 trp1-1 can1-100 leu2-3,112 his3-11,15 ura3 GAL+ psi+ ssd1-d2 RAD5</i>                        | W303        | 2533x2585    |
| 2641* | <i>MATalpha chk1::HIS3 cdc13-1 int ade2-1 trp1-1 can1-100 leu2-3,112 his3-11,15 ura3 GAL+ psi+ ssd1-d2 RAD5</i>                                 | W303        | 2533x2585    |
| 2646* | <i>MATa mrc1::KanMX6 EXO1 bar1::hisG ade2-1 trp1-1 can1-100 leu2-3,112 his3-11,15 ura3 GAL+ psi+ ssd1-d2 RAD5 cdc15-2 int cdc13-1 int</i>       | W303        | 2619x1431    |
| 2709* | <i>MATalpha ade2-1 trp1-1 can1-100 leu2-3,112 his3-11,15 ura3 GAL+ psi+ ssd1-d2 RAD5 mrc1::KANMX6</i>                                           | W303        | 2512x1297    |
| 2990* | <i>MATalpha rad53::HIS3 sml1::KanMX6 cdc13-1 RAD5 ade2-1 trp1-1 can1-100 ura3 GAL+ psi+ ssd1-d2</i>                                             | W303        | 2930x2116    |
| 3051* | <i>MATalpha sml1::KanMX6 RAD5 ade2-1 trp1-1 can1-100 ura3 GAL+ psi+ ssd1-d2</i>                                                                 | W303        | 2930x2116    |
| 3055* | <i>MATalpha mrc1::URA3 rad53::HIS3 sml1::KanMX6 cdc13-1 RAD5 ade2-1 trp1-1 can1-100 ura3 GAL+ psi+ ssd1-d2</i>                                  | W303        | 2993x1296    |
| 3062* | <i>MATalpha mrc1::KANMX6 yku70::HIS3 exo1::LEU2 ade2-1 trp1-1 can1-100 leu2-3,112 his3-11,15 ura3 GAL+ psi+ ssd1-d2 RAD5</i>                    | W303        | 2709x1408    |
| 3064* | <i>MATa mrc1::URA3 rad53::HIS3 sml1::KanMX6 RAD5 ade2-1 trp1-1 can1-100 ura3 GAL+ psi+ ssd1-d2</i>                                              | W303        | 3052x2991    |
| 3071* | <i>MATa mrc1::KanMX6 exo1::LEU2 bar1::hisG ade2-1 trp1-1 can1-100 leu2-3,112 his3-11,15 ura3 GAL+ psi+ ssd1-d2 RAD5 cdc15-2 int cdc13-1 int</i> | W303        | 2619x1431    |
| 3277* | <i>MATalpha mrc1::URA3 sml1::KanMX6 cdc13-1 CDC15+ RAD5 ade2-1 trp1-1 can1-100 ura3 GAL+ psi+ ssd1-d2</i>                                       | W303        | 2993x1296    |
| 3278* | <i>MATa sml1::KanMX6 cdc13-1 CDC15+ RAD5 ade2-1 trp1-1 can1-100 ura3 GAL+ psi+ ssd1-d2</i>                                                      | W303        | 2993x1296    |
| 3393  | <i>MATa LEU2::cdc13-1 int::URA3 mfa::MFA1pr-HIS3 ura30 leu20 his31 lys20 tof1::KANMX</i>                                                        | S288C (C4B) | Dan Durocher |
| 3394  | <i>MATa LEU2::cdc13-1 int::URA3 mfa::MFA1pr-HIS3 ura30 leu20 his31 lys20 tof1::KANMX</i>                                                        | S288C (FIA) | Dan Durocher |
| 3395  | <i>MATa LEU2::cdc13-1 int::URA3 mfa::MFA1pr-HIS3 ura30 leu20 his31 lys20 mrc1::KANMX</i>                                                        | S288C (C4B) | Dan Durocher |
| 3396  | <i>MATa LEU2::cdc13-1 int::URA3 mfa::MFA1pr-HIS3 ura30 leu20 his31 lys20 mrc1::KANMX</i>                                                        | S288C (FIA) | Dan Durocher |
| 3397  | <i>MATa LEU2::cdc13-1 int::URA3 mfa::MFA1pr-HIS3 ura30 leu20 his31 lys20 csm3::KANMX</i>                                                        | S288C (C4B) | Dan Durocher |
| 3398  | <i>MATa LEU2::cdc13-1 int::URA3 mfa::MFA1pr-HIS3 ura30 leu20 his31 lys20 csm3::KANMX</i>                                                        | S288C (FIA) | Dan Durocher |
| 3402  | <i>MATa LEU2::cdc13-1 int::URA3 mfa::MFA1pr-HIS3 ura30 leu20 his31 lys20 his3::KANMX</i>                                                        | S288C (C4B) | Dan Durocher |
